# Supplementary material for: Phenol-Grafted Alginate Sulfate Hydrogel as an Injectable FGF-2 Carrier
Source: MDPI journal article supplement (doi:10.3390/gels8120818), 2022-12-12
Supplement: s1 [file s1]

Article

# Phenol-Grafted Alginate Sulfate Hydrogel as an Injectable FGF-2 Carrier

Ryota Goto <sup>1</sup>, Masaki Nakahata <sup>2,\*</sup> and Shinji Sakai <sup>1,\*</sup>

<sup>1</sup> Department of Materials Engineering Science, Graduate School of Engineering Science, Osaka University, Toyonaka 560-8531, Japan

<sup>2</sup> Department of Macromolecular Science, Graduate School of Science, Osaka University, Toyonaka 560-0043, Japan

\* Correspondence: nakahata@chem.sci.osaka-u.ac.jp (M.N.); sakai.shinji.es@osaka-u.ac.jp (S.S.)

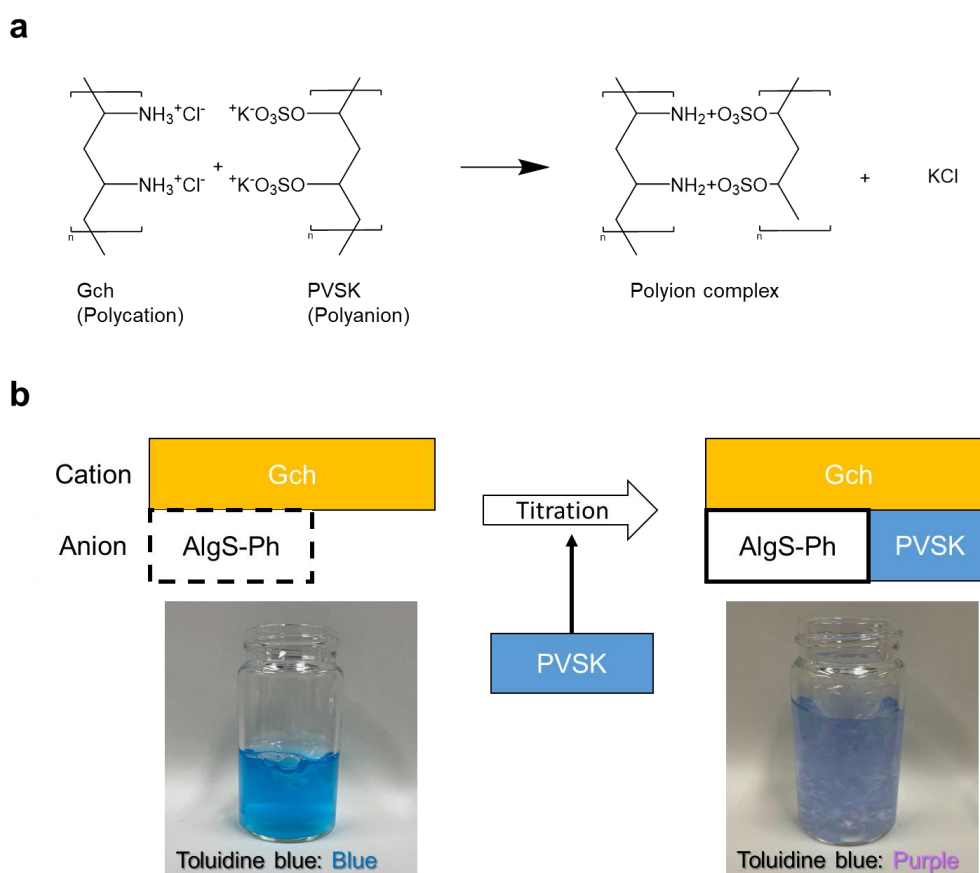

**Figure S1.** Colloidal titration. (a) The reaction to form polyion complex between polycation (glycol chitosan (Gch)) and polyanion (potassium polyvinyl sulfate (PVSK)). (b) schematic diagram of a titration.

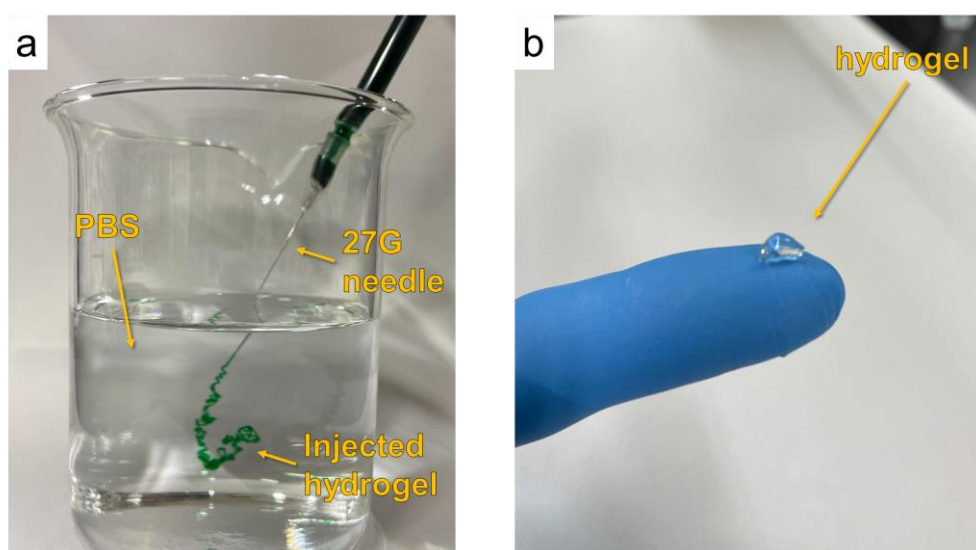

**Figure S2.** (a) AlgS(0.53)-Ph hydrogel dyed with green-color dye injected from 27G needle into PBS. (b) Cross-linked hydrogel

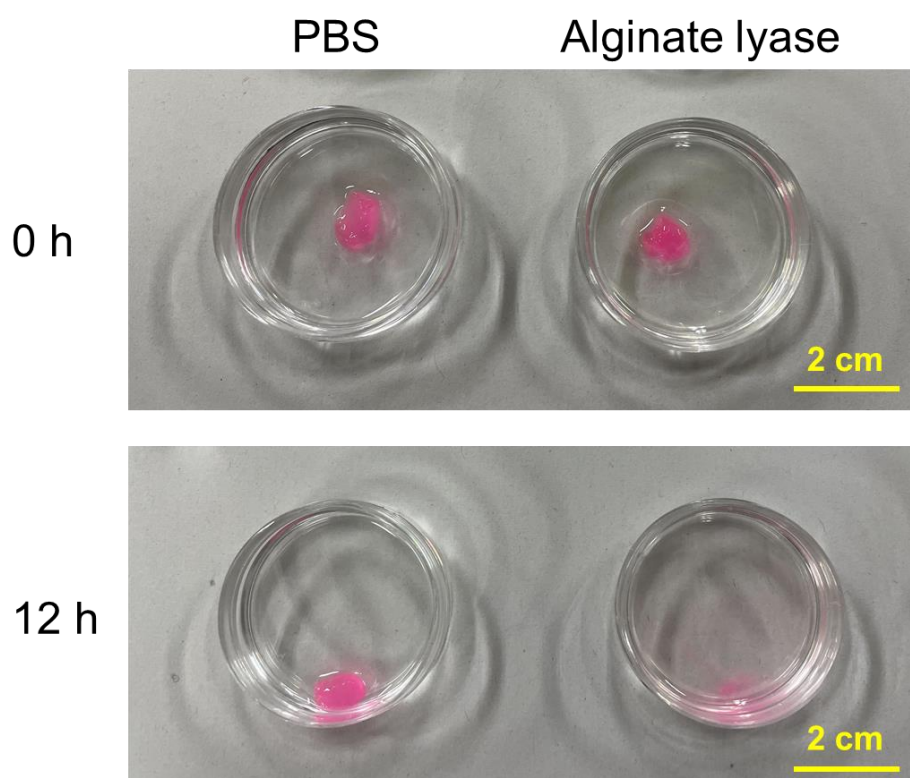

**Figure S3.** Degradation test of AlgS(0.53)-Ph hydrogel dyed with pink-color dye in PBS with or without 1 mg/mL alginate lyase. (Scale bar: 2 cm)
